# Supplementary material for: Nucleosome alterations caused by mutations at modifiable histone residues in Saccharomyces cerevisiae
Source: PubMed Central journal article supplement (PMC4620441; doi:10.1038/srep15583), 2015-10-26

# Nucleosome alterations caused by mutations at modifiable histones residues in *Saccharomyces cerevisiae*

Hongde Liu<sup>1,+,\*</sup>, Pingyan Wang<sup>2,+</sup>, Lingjie Liu<sup>1</sup>, Zhu Min<sup>2,4</sup>, Kun Luo<sup>3</sup> and Yakun Wan<sup>2,4,\*</sup>

<sup>1</sup>State Key Laboratory of Bioelectronics, Southeast University, Nanjing 210096, China;

<sup>2</sup>Institute of Life Sciences, Southeast University, Nanjing 210096, China;

<sup>3</sup>Department of Neurosurgery, Xinjiang Evidence-Based Medicine Research Institute, First Affiliated Hospital of Xinjiang Medical University, Urumqi 830054, China;

<sup>4</sup>Shanghai Institute of Materia Medica, Chinese Academy of Sciences, Shanghai 201203, China

<sup>+</sup>These authors contributed equally to this work.

<sup>\*</sup>Corresponding authors: liuhongde@seu.edu.cn (HDL); ykwan@simm.ac.cn (YKW).

## **E-mail:**

liuhongde@seu.edu.cn (HDL)

yami\_seu@163.com (PYW)

lingjie26@126.com (LJL)

zhumin555111@163.com (ZM)

luokun\_2822@sohu.com (KL)

ykwan@simm.ac.cn (YKW)

**Running title:** Nucleosome dynamics and histone mutations

# Supporting information

## Table captions

**Table S1 Yeast histone mutants used in this study.**

**Table S2 Genotypes of the relevant strains.**

**Table S3 Percentage of dynamic genomic regions in 22 mutants**

The whole yeast genome was divided into 24,135 continuous segments. Each segment was 0.5 kb in length. A dynamic segment was identified if the correlation coefficient of the nucleosome occupancy between the mutant and wild-type strains was less than 0.5 (see Methods). The table lists the percentage of dynamic segments relative to all segments. For any segment, if the average nucleosome occupancy in the mutant strain is greater than that in the wild-type strain, the nucleosome occupancy is increased in the segment upon histone mutation; otherwise, the nucleosome occupancy is decreased. The 22 mutants were ranked in the fifth column by the percentage of dynamic segments. The distribution of the dynamic segments is shown in Figure S1a.

**Table S4 Hypothesis test for the promoter distribution in the nucleosome occupancy-increased and occupancy-decreased genomic segments.**

The test is based on hypergeometric distribution. The yeast genome was divided into 24,135 continuous segments where there are 6253 promoter-segments. The promoter-segments mean that the segments centers are at the promoters (the genomic regions of  $-0.5$  kbp  $\sim$   $+0.3$  kbp relative to TSSs). The nucleosome occupancy -increased and -decreased segments were counted respectively. Also, the occupancy -increased and -decreased promoter-segments were counted respectively. The hypothesis test was carried out for both occupancy -increased and -decreased promoter-segments. Significance was indicated with P-value ( $-\log_{10}$ ) of the test. The occupancy-increased segments were significantly enriched at promoters in mutants H3S10A, H3K18A, H4K20A, H4K5A and H4K16A. Contrastingly, the occupancy-decreased segments were not enriched at promoters in any mutants.

## Figure legends

### **Figure S1 Different histone mutations cause different alterations in the nucleosome occupancy of the whole genome.**

(a): Distribution (pie plot) of the dynamic segments for each mutant. The dynamic segments ( $r < 0.5$ ) are counted by their genomic loci: promoter ( $-0.5$  kb to  $0.3$  kb relative to the transcription start site [TSS]), gene body ( $0.3$  kb to TTS), and other regions.

(b): Number of overlapped dynamic segments between the mutants (lower triangular matrix) and the ratio (R) of the percentage of the overlapped dynamic segments in mutant A to the percentage of the dynamic segments in mutant B to total segments (24,135) (upper triangular matrix).

Given the number (O\_num) of overlapped dynamic segments between mutant A and mutant B, and the number of the dynamic segments in the mutant A (A\_num) and the mutant B (B\_num), respectively, the ratio (R) was calculated with  $R = [O\_num/A\_num]/[B\_num/24135]$ , which indicating the overlapped degree between two mutants. The result was shown in the upper triangular matrix. We got infinitesimal P-values for all pairs of the mutants in using hypergeometric test to test the significance of the overlapped dynamic segments. Thus, instead of P-values, we used the ratio (R) to indicate the overlapped degree. The results indicated that the dynamic segments are highly overlapped between the pairs of the mutants H3K9A and H4R3A, the mutants H2B123A and H2B16A, and the mutants H2B16A and H2AS128A.

### **Figure S2 The correlation coefficients (r) between histones modifications and nucleosome dynamics.**

The yeast genome was divided into 24,135 continuous segments (see Method section and Fig. 1). Each segment was 0.5 kb in length. The nucleosome dynamics of each segment between the mutant and wild-type strain was indicated with correlation coefficient (Nu-r). We firstly calculated the average value (av-HM) of histone modification profile at each segment. Then, we calculated correlation coefficient (r) between the average value of histone modification (av-HM) and the nucleosome dynamics (Nu-r) for the 24,135 segments. The coefficient (r), shown in the table, indicates the association between the histone modification and nucleosome dynamics. A greater coefficient (r) suggests that the histone modification associates nucleosome instability (dynamics); reversely, a smaller coefficient (r) suggests that the histone modification is favorable to nucleosome stability.

Acetylations at H3K14, H3K18, H4K5 and H4K8 (H3K4Ac, H3K18Ac, H4K5Ac and H4K8Ac) prefer nucleosome-stable genomic segments. Tri-methylation at H4K20 (H4K20Me3) and acetylation at H4K16 prefer nucleosome-dynamic genomic segments. The effects are found almost in all of the mutants, suggesting that the effects are independent with the types of histones mutations.

### **Figure S3 Nucleosome occupancy difference and histone modification profile at telomeres and centromeres.**

(a): Difference significance of nucleosome occupancy at telomeres and centromeres between each mutant and the wild-type strain. The bar plot shows the P-values ( $-\log_{10}$ ) that were calculated

with a two-sample *t*-test for the average nucleosome occupancy in telomeres between each mutant and wild-type strain. P-values for centromeres are also shown.

(b): Histones modifications at telomeres and centromeres in wild type strain. The profile of histone modification is represented with relative reads counts (fold change of reads count at each genomic region to average reads count of whole genome). Shown profiles are averaged for 16 chromosomes.

**Figure S4 Variation of occupancy and dyad position of nucleosomes near transcription start and terminations sites (TSSs and TTSs).**

(a): Dyad position shift of the mutant to the wild type (left panels) and occupancy variation (right panels). The dyad position was identified with function “peaksfind()” of Matlab (R2009) (see Method section).

(b): Difference significance of occupancy at the -1, +1 and +2 nucleosomes and in 400-bp region around TTSs between the mutant and the wild type strain. Shown is  $-\log_{10}(\text{P-values})$  of two-sample *t*-test.

**Figure S5 Nucleosome occupancy dynamics of 5419 genes.**

(a): Nucleosome occupancy profiles in the vicinity of TSSs for 5419 genes in 22 mutant strains.

(b): Dynamics of the -1 and +1 nucleosomes at 5419 promoters. Nucleosome occupancy dynamics are defined by five groups: stable, position shift < 30 bp and  $-2 < \text{fold change of occupancy} < 2$ ; increased, position shift < 30 bp and  $\text{fold change of occupancy} > 2$ ; decreased, position shift < 30 bp and  $\text{fold change of occupancy} < -2$ ; gain, position shift > 147 bp and  $\text{fold change of occupancy} > 2$ ; and loss, position shift > 147 bp and  $\text{fold change of occupancy} < -2$ . The table indicates the number of each dynamic type for the -1 and +1 nucleosomes of 5419 promoters in 22 mutants.

**Figure S6 Fourier spectra of nucleosome occupancy in the mutant and wild-type strains.**

First, the autocorrelation signal of the nucleosome occupancy profile of 16 chromosomes was calculated. Then, a fast Fourier transformation (FFT) was performed using the autocorrelation signal.

**Figure S7 Clustering of correlation coefficients.**

For each of the 5419 yeast genes, the correlation coefficient of the nucleosome occupancy profile in the range of -0.5 kb to 0.3 kb relative to the TSS was calculated between each mutant strain and the wild-type strain. This was done for 22 mutants, resulting in matrix of  $5419 \times 22$ . The bi-clustering for the matrix is shown.

**Figure S8 Profiles of histones modifications around transcription start sites of both top 108 dynamic genes and top 108 stable genes.**

The dynamic genes and the stable genes were identified by calculating correlation coefficients of nucleosome occupancies between the mutant and the wild type strain (see Method section and Fig. 3).

**Figure S9 Common dynamic genes in mutant strains**

(a): The number of overlapping dynamic genes in mutants H3S10A, H3K56A, H4K16A, H4K20A, H3K18A, and H4K5A. In each mutant strain, dynamic genes are identified by ranking the correlation coefficients of the nucleosome occupancy profiles between the mutant and wild-type strains (see Fig. 3 and Methods). The 108 genes with the lowest coefficients were chosen. The table indicates the number of overlapping dynamic genes.

(b): Same as A except for overlapping stable genes. For each mutant, the top 108 stable genes that are associated with the highest coefficients were chosen.

(c): Nucleosome occupancy profiles for the *TDH2* gene in the H3S10A, H3K56A, H4K16A, and H4K20A mutant strains. The black line indicates the wild-type profile.

(d): Same as C except for the *CDC19* gene.

(e): Same as C except for the *RPS16A* gene.

**Figure S10 Enrichment analysis for Gene Ontology terms for the top 108 dynamic genes in each mutant strain. The analysis was performed using DAVID.**

**Figure S11 Western blot analysis of histone H3 in wild-type strain and histone mutant strain.**

108 cells of each strain were harvested and homogenized in protein extraction buffer (20 mM Tris PH 7.5, 0.1M NaCl, 1 mM EDTA, 1× protease inhibitor cocktail (PIC)) to prepare of whole protein extracts. The lysates were centrifuged at 12,000× g at 4 ° C for 2 min. Protein concentrations were determined by the BCA protein assay kit and 120 μ g of protein were loaded per well on SDS-PAGE. Subsequently, proteins were transferred to PVDF membrane (0.22 μ M, Millipore, USA). Membrane was blocked at room temperature for 1 h with 5% skimmed milk in Tris-buffered solution plus Tween-20 (TBST). Membrane was then incubated overnight at 4 ° C with primary antibodies for Anti-Histone H3 (Millipore, USA). After three 10 min washing in TBST, membrane was incubated for 2 h at room temperature with a horseradish peroxidase-conjugated secondary antibody. The proteins were visualized using an enhanced chemiluminescence Western blot detection kit. The relative expression of H3 proteins was quantified by the Image-Analysis system.

**Figure S12 Test of biological replication for the mutants H3S10A, H3K56A, H4K20A and H4K16A.**

(a): Nucleosome occupancy profiles for a segment of chromosome 1 in two biological replications (Rep1 and Rep2) for the four types of mutant strains.

(b): the nucleosome occupancy at both the telomeres and the centromeres in two biological replications. Top panels are for replication 1, and bottom panels are for replication 2.

Table S1

## Yeast histone mutants used in this study

| H2A(HTA1) | H2B(HTB1) | H3(HHT2) | H4(HHF2) |
|-----------|-----------|----------|----------|
| K21A      | K16A      | K4A      | R3A      |
| S121A     | K123A     | K23A     | K20A     |
| S128A     |           | K14A     | K5A      |
| K7A       |           | K36A     | K91A     |
|           |           | S28A     | K16A     |
|           |           | K79A     | K8A      |
|           |           | K9A      |          |
|           |           | S10A     |          |
|           |           | K56A     |          |
|           |           | K18A     |          |

Table S2

## Genotype of the relevant strains

| Strain | Genotype                                                                                                                             |
|--------|--------------------------------------------------------------------------------------------------------------------------------------|
| YBL574 | <i>MAT a leu2-1 his3-200 ura3-52 trp1-63 lys2-128 (hht1-hhf1)::LEU2 (hht2-hhf2)::HIS3 Ty912Δ35-lacZ::HIS4 pWA414 [F12-HHT2-HHF2]</i> |
| FY406  | <i>MAT a leu2-1 his3-200 ura3-52 trp1-63 lys2-128 (hta1-htb1)::LEU2 (hta2-htb2)::TRP1 pZS145 [HTA1-Flag-HTB1]</i>                    |

Table S3

## Percentage of dynamic genomic regions in 22 mutants

|            |       | Percentage of dynamic regions<br>(total: 24135<br>0.5kbp-long<br>genomic<br>segments) (100%) | Percentage of nucleosome-<br>increased regions<br>(P_up) (100%) | Percentage of nucleosome-<br>decreased<br>regions (P_down)<br>(100%) | Rank |
|------------|-------|----------------------------------------------------------------------------------------------|-----------------------------------------------------------------|----------------------------------------------------------------------|------|
| <b>H2A</b> | K21A  | 3.8742                                                                                       | 1.4171                                                          | 2.4571                                                               | 16   |
|            | S121A | 4.6698                                                                                       | 1.2182                                                          | 3.4516                                                               | 15   |
|            | S128A | 2.5524                                                                                       | 0.7458                                                          | 1.8066                                                               | 17   |
|            | K7A   | 1.9143                                                                                       | 0.7003                                                          | 1.2141                                                               | 18   |
| <b>H2B</b> | K16A  | 1.1975                                                                                       | 0.3895                                                          | 0.8080                                                               | 21   |
|            | K123A | 0.7210                                                                                       | 0.3108                                                          | 0.4102                                                               | 22   |
| <b>H3</b>  | K4A   | 7.1062                                                                                       | 3.0123                                                          | 4.0938                                                               | 10   |
|            | K23A  | 4.8769                                                                                       | 2.1173                                                          | 2.7596                                                               | 14   |
|            | K14A  | 5.8631                                                                                       | 2.5897                                                          | 3.2734                                                               | 12   |
|            | K36A  | 14.0797                                                                                      | 7.8147                                                          | 6.2650                                                               | 6    |
|            | S28A  | 5.4985                                                                                       | 2.0220                                                          | 3.4764                                                               | 13   |
|            | K79A  | 14.5314                                                                                      | 6.2609                                                          | 8.2705                                                               | 4    |
|            | K9A   | 1.7651                                                                                       | 0.7707                                                          | 0.9944                                                               | 19   |
|            | S10A  | 10.8312                                                                                      | 5.6601                                                          | 5.1711                                                               | 8    |
|            | K56A  | 12.7952                                                                                      | 5.4156                                                          | 7.3796                                                               | 7    |
|            | K18A  | 9.7912                                                                                       | 4.4129                                                          | 5.3783                                                               | 9    |
| <b>H4</b>  | R3A   | 1.3964                                                                                       | 0.7044                                                          | 0.6920                                                               | 20   |
|            | K20A  | 15.4802                                                                                      | 6.1490                                                          | 9.3312                                                               | 1    |
|            | K5A   | 14.7220                                                                                      | 5.1794                                                          | 9.5426                                                               | 3    |
|            | K91A  | 14.4361                                                                                      | 6.5675                                                          | 7.8686                                                               | 5    |
|            | K16A  | 15.2813                                                                                      | 6.7581                                                          | 8.5232                                                               | 2    |
|            | K8A   | 6.0910                                                                                       | 2.2831                                                          | 3.8079                                                               | 11   |

Table S4

Hypothesis test for the promoter distribution in the nucleosome occupancy-increased and occupancy-decreased genomic segments

| Mutants strains | Hyper-geometric test for the promoter distribution in the nucleosome occupancy-increased genomic segments |                                                                |                 |                               | Hyper-geometric test for the promoter distribution in the nucleosome occupancy-decreased genomic segments |                                                                |                 |                               |
|-----------------|-----------------------------------------------------------------------------------------------------------|----------------------------------------------------------------|-----------------|-------------------------------|-----------------------------------------------------------------------------------------------------------|----------------------------------------------------------------|-----------------|-------------------------------|
|                 | Number of the occupancy-increased segments (SI_N)                                                         | Number of promoters in the occupancy-increased segments (PI_N) | [PI_N] / [SI_N] | P-value (-log <sub>10</sub> ) | Number of the occupancy-decreased segments (SD_N)                                                         | Number of promoters in the occupancy-decreased segments (PD_N) | [PD_N] / [SD_N] | P-value (-log <sub>10</sub> ) |
| H2AK21A         | 342                                                                                                       | 14                                                             | 0.0410          | 0                             | 593                                                                                                       | 116                                                            | 0.1960          | 0                             |
| H2AS121A        | 294                                                                                                       | 74                                                             | 0.2520          | 0.2000                        | 833                                                                                                       | 21                                                             | 0.0250          | 0                             |
| H2AS128A        | 180                                                                                                       | 35                                                             | 0.1940          | 0                             | 436                                                                                                       | 39                                                             | 0.0890          | 0                             |
| H2AK7A          | 169                                                                                                       | 33                                                             | 0.1950          | 0                             | 293                                                                                                       | 34                                                             | 0.1160          | 0                             |
| H2BK16A         | 94                                                                                                        | 12                                                             | 0.1280          | 0                             | 195                                                                                                       | 22                                                             | 0.1130          | 0                             |
| H2BK123A        | 75                                                                                                        | 6                                                              | 0.0800          | 0                             | 99                                                                                                        | 2                                                              | 0.0200          | 0                             |
| H3K4A           | 727                                                                                                       | 94                                                             | 0.1290          | 0                             | 988                                                                                                       | 50                                                             | 0.0510          | 0                             |
| H3K23A          | 511                                                                                                       | 53                                                             | 0.1040          | 0                             | 666                                                                                                       | 55                                                             | 0.0830          | 0                             |
| H3K14A          | 625                                                                                                       | 80                                                             | 0.1280          | 0                             | 790                                                                                                       | 31                                                             | 0.0390          | 0                             |
| H3K36A          | 1886                                                                                                      | 124                                                            | 0.0660          | 0                             | 1512                                                                                                      | 40                                                             | 0.0260          | 0                             |
| H3S28A          | 488                                                                                                       | 38                                                             | 0.0780          | 0                             | 839                                                                                                       | 118                                                            | 0.1410          | 0                             |
| H3K79A          | 1511                                                                                                      | 226                                                            | 0.1500          | 0                             | 1996                                                                                                      | 94                                                             | 0.0470          | 0                             |
| H3K9A           | 186                                                                                                       | 68                                                             | 0.3660          | 3.3000                        | 240                                                                                                       | 17                                                             | 0.0710          | 0                             |
| H3S10A          | 1366                                                                                                      | 624                                                            | 0.4570          | Inf                           | 1248                                                                                                      | 93                                                             | 0.0750          | 0                             |
| H3K56A          | 1307                                                                                                      | 384                                                            | 0.2940          | 2.8000                        | 1781                                                                                                      | 122                                                            | 0.0690          | 0                             |
| H3K18A          | 1065                                                                                                      | 401                                                            | 0.3770          | Inf                           | 1298                                                                                                      | 62                                                             | 0.0480          | 0                             |
| H4R3A           | 170                                                                                                       | 43                                                             | 0.2530          | 0.3000                        | 167                                                                                                       | 17                                                             | 0.1020          | 0                             |
| H4K20A          | 1484                                                                                                      | 656                                                            | 0.4420          | Inf                           | 2252                                                                                                      | 203                                                            | 0.0900          | 0                             |
| H4K5A           | 1250                                                                                                      | 517                                                            | 0.4140          | Inf                           | 2303                                                                                                      | 280                                                            | 0.1220          | 0                             |
| H4K91A          | 1585                                                                                                      | 175                                                            | 0.1100          | 0                             | 1899                                                                                                      | 123                                                            | 0.0650          | 0                             |
| H4K16A          | 1631                                                                                                      | 712                                                            | 0.4370          | Inf                           | 2057                                                                                                      | 153                                                            | 0.0740          | 0                             |
| H4K8A           | 551                                                                                                       | 82                                                             | 0.1490          | 0                             | 919                                                                                                       | 42                                                             | 0.0460          | 0                             |



Figure S1

(a)

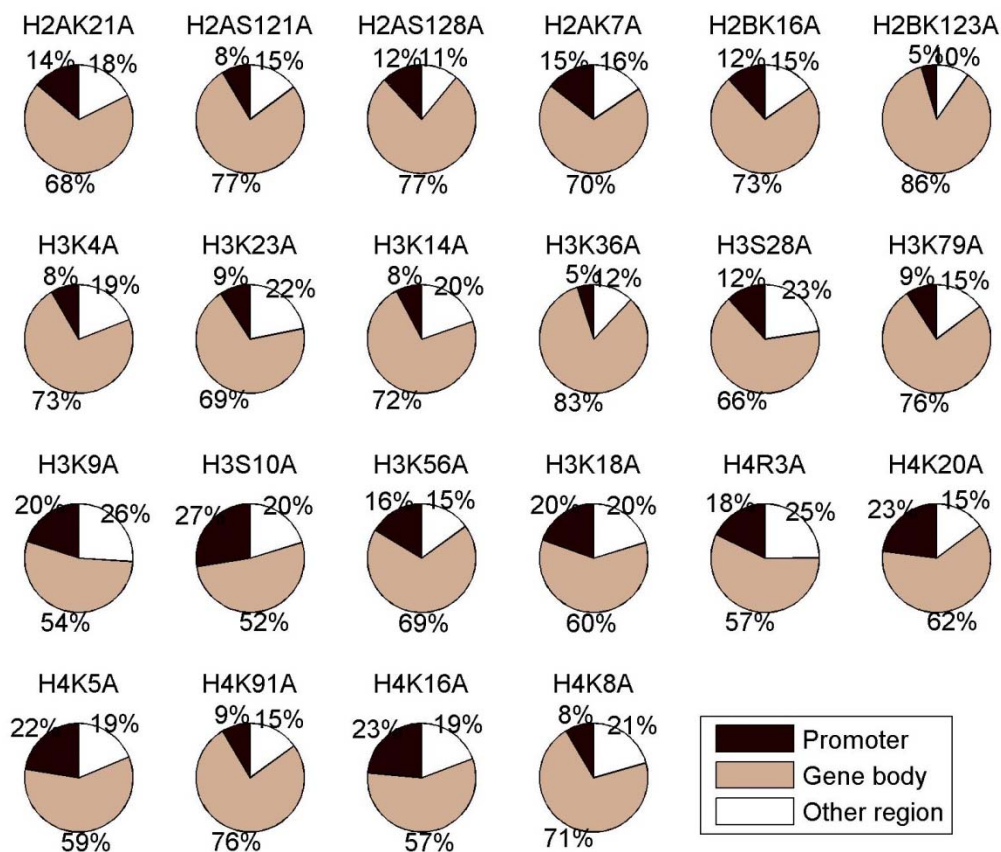

(b)

|     | H2AK21A | H2AS121A | H2AS128A | H2AK7A | H2BK16A | H2BK123A | H3K4A | H3K23A | H3K14A | H3K36A | H3S28A | H3K79A | H3K9A | H3S10A | H3K56A | H3K18A | H4R3A | H4K20A | H4K5A | H4K91A | H4K16A | H4K8A    |
|-----|---------|----------|----------|--------|---------|----------|-------|--------|--------|--------|--------|--------|-------|--------|--------|--------|-------|--------|-------|--------|--------|----------|
| 935 | 4.5     | 8.9      | 8        | 10.4   | 7.9     | 6.1      | 7.3   | 6.7    | 3.9    | 7.1    | 3.8    | 7.1    | 3.3   | 2.8    | 4.6    | 7.6    | 2.5   | 3.4    | 3.8   | 3.2    | 6.1    | H2AK21A  |
| 195 | 1127    | 7.5      | 8.6      | 11.6   | 10.3    | 4.8      | 5.1   | 4.9    | 3.4    | 4.3    | 3.4    | 7.2    | 3.8   | 4.9    | 3.9    | 7.6    | 3.7   | 2.7    | 3.2   | 3.3    | 4.9    | H2AS121A |
| 213 | 217     | 616      | 13.4     | 16.9   | 10.4    | 5.9      | 6.5   | 6.6    | 4      | 6.2    | 4.2    | 10.4   | 3.9   | 3.4    | 4.6    | 10.9   | 3     | 3.4    | 4     | 3.3    | 6.2    | H2AS128A |
| 143 | 185     | 158      | 462      | 21.5   | 13.5    | 6.5      | 8     | 7.6    | 4.1    | 7.8    | 4.1    | 12.9   | 4.7   | 4.2    | 5.3    | 14.1   | 3.2   | 3.7    | 3.9   | 3.8    | 7.3    | H2AK7A   |
| 116 | 156     | 125      | 119      | 289    | 17.8    | 7.2      | 8.7   | 7.8    | 4.3    | 7.8    | 4.2    | 13.7   | 4.2   | 4.1    | 5.4    | 16.1   | 3.5   | 4      | 4     | 3.8    | 7.2    | H2BK16A  |
| 53  | 84      | 46       | 45       | 37     | 174     | 6.7      | 6.1   | 6.8    | 4.9    | 6.7    | 4.2    | 9.4    | 3.3   | 4.6    | 4.2    | 13.6   | 3.2   | 3      | 4.1   | 3.3    | 6.4    | H2BK123A |
| 406 | 381     | 260      | 212      | 147    | 83      | 1715     | 9.8   | 9.3    | 5.3    | 8.5    | 5.1    | 7      | 3.7   | 3      | 5.8    | 7.8    | 2.6   | 3.8    | 4.7   | 3.9    | 9      | H3K4A    |
| 334 | 280     | 194      | 180      | 123    | 52      | 818      | 1177  | 11.5   | 5.1    | 11.5   | 4.9    | 9.6    | 3.8   | 3      | 6.3    | 9.2    | 2.8   | 4.2    | 4.9   | 4.4    | 10.9   | H3K23A   |
| 370 | 323     | 238      | 207      | 132    | 69      | 937      | 791   | 1415   | 5      | 9.8    | 4.9    | 8.3    | 3.6   | 3      | 6      | 8.9    | 2.5   | 3.8    | 4.7   | 3.9    | 9.6    | H3K14A   |
| 509 | 541     | 347      | 265      | 176    | 120     | 1280     | 845   | 1004   | 3398   | 4.5    | 4.1    | 4      | 2.5   | 2.7    | 3.6    | 4.5    | 2.1   | 2.5    | 3.9   | 2.7    | 5.1    | H3K36A   |
| 366 | 265     | 209      | 199      | 124    | 64      | 802      | 742   | 761    | 844    | 1327   | 4.5    | 8.8    | 3.9   | 2.7    | 6.1    | 8.7    | 2.6   | 4.4    | 4.6   | 4.1    | 9.6    | H3S28A   |
| 512 | 562     | 380      | 273      | 177    | 106     | 1259     | 835   | 1011   | 2023   | 865    | 3507   | 4.3    | 3     | 2.8    | 3.8    | 4.7    | 2.4   | 2.7    | 3.7   | 3.1    | 5.2    | H3K79A   |
| 117 | 143     | 113      | 105      | 70     | 29      | 213      | 199   | 207    | 241    | 205    | 266    | 426    | 6.6   | 5.6    | 7.1    | 19     | 5     | 5.2    | 4     | 5.1    | 9.6    | H3K9A    |
| 337 | 466     | 259      | 233      | 131    | 63      | 687      | 487   | 546    | 906    | 554    | 1131   | 306    | 2614  | 4      | 5.1    | 5.6    | 4.1   | 4.1    | 2.5   | 4.6    | 4.3    | H3S10A   |
| 339 | 702     | 270      | 247      | 152    | 102     | 666      | 451   | 544    | 1171   | 455    | 1274   | 304    | 1328  | 3088   | 3      | 5.1    | 3.7   | 2.3    | 2.4   | 2.9    | 3.2    | H3K56A   |
| 425 | 425     | 276      | 240      | 152    | 72      | 972      | 730   | 826    | 1185   | 798    | 1314   | 296    | 1312  | 921    | 2363   | 5.7    | 3     | 5.1    | 3.6   | 4.7    | 6.7    | H3K18A   |
| 99  | 119     | 94       | 91       | 65     | 33      | 187      | 151   | 175    | 213    | 162    | 231    | 113    | 206   | 221    | 189    | 337    | 3.9   | 4.1    | 4.3   | 4.1    | 8      | H4R3A    |
| 366 | 640     | 289      | 231      | 158    | 86      | 680      | 506   | 550    | 1126   | 530    | 1303   | 327    | 1655  | 1753   | 1081   | 202    | 3736  | 2.4    | 2     | 3.4    | 2.9    | H4K20A   |
| 473 | 454     | 308      | 250      | 172    | 77      | 962      | 722   | 797    | 1266   | 863    | 1388   | 326    | 1567  | 1047   | 1762   | 202    | 1305  | 3553   | 2.6   | 3.7    | 4.5    | H4K5A    |
| 510 | 517     | 355      | 261      | 168    | 102     | 1164     | 827   | 962    | 1935   | 876    | 1850   | 248    | 950   | 1080   | 1212   | 210    | 1083  | 1359   | 3484  | 2.7    | 4.9    | H4K91A   |
| 461 | 564     | 311      | 270      | 166    | 89      | 1018     | 789   | 844    | 1412   | 835    | 1644   | 335    | 1849  | 1356   | 1699   | 209    | 1920  | 2007   | 1437  | 3688   | 4.6    | H4K16A   |
| 346 | 334     | 232      | 205      | 127    | 68      | 939      | 782   | 829    | 1050   | 776    | 1111   | 250    | 686   | 594    | 961    | 164    | 671   | 972    | 1046  | 1039   | 1470   | H4K8A    |

Figure S2

|          | H3K4Ac | H3K23Ac | H3K14Ac | H3K36Me3 | H3K79Me3 | H3K9Ac | H3S10Ph | H3K56Ac | H3K18Ac | H4R3Me3 | H4K20Me3 | H4K5Ac | H4K16Ac | H4K8Ac |
|----------|--------|---------|---------|----------|----------|--------|---------|---------|---------|---------|----------|--------|---------|--------|
| H2AK21A  | 0.079  | 0.067   | 0.121   | -0.047   | -0.012   | 0.049  | -0.002  | 0.031   | 0.127   | -0.058  | -0.081   | 0.092  | -0.061  | 0.079  |
| H2AS121A | 0.062  | 0.054   | 0.12    | -0.086   | -0.03    | 0.014  | -0.034  | -0.001  | 0.126   | -0.123  | -0.149   | 0.164  | -0.138  | 0.145  |
| H2AS128A | 0.084  | 0.068   | 0.125   | -0.084   | -0.03    | 0.049  | -0.012  | 0.028   | 0.139   | -0.085  | -0.127   | 0.127  | -0.101  | 0.109  |
| H2AK7A   | 0.095  | 0.089   | 0.151   | -0.061   | -0.019   | 0.057  | -0.003  | 0.035   | 0.158   | -0.075  | -0.1     | 0.136  | -0.077  | 0.118  |
| H2BK16A  | 0.102  | 0.091   | 0.154   | -0.051   | -0.001   | 0.061  | 0.004   | 0.043   | 0.146   | -0.068  | -0.087   | 0.132  | -0.066  | 0.12   |
| H2BK123A | 0.143  | 0.12    | 0.212   | -0.066   | 0.013    | 0.091  | -0.012  | 0.058   | 0.221   | -0.104  | -0.136   | 0.164  | -0.101  | 0.154  |
| H3K4A    | 0.081  | 0.067   | 0.138   | -0.093   | -0.037   | 0.037  | -0.026  | 0.017   | 0.149   | -0.103  | -0.134   | 0.105  | -0.112  | 0.093  |
| H3K23A   | 0.068  | 0.055   | 0.12    | -0.085   | -0.037   | 0.027  | -0.025  | 0.012   | 0.13    | -0.096  | -0.125   | 0.101  | -0.108  | 0.088  |
| H3K14A   | 0.066  | 0.053   | 0.12    | -0.098   | -0.045   | 0.024  | -0.029  | 0.009   | 0.13    | -0.101  | -0.129   | 0.087  | -0.112  | 0.075  |
| H3K36A   | 0.109  | 0.079   | 0.169   | -0.127   | -0.019   | 0.055  | -0.032  | 0.031   | 0.193   | -0.13   | -0.187   | 0.126  | -0.155  | 0.115  |
| H3S28A   | 0.088  | 0.075   | 0.14    | -0.061   | -0.02    | 0.051  | -0.012  | 0.031   | 0.149   | -0.075  | -0.096   | 0.098  | -0.075  | 0.087  |
| H3K79A   | 0.07   | 0.05    | 0.116   | -0.121   | -0.048   | 0.029  | -0.041  | 0.007   | 0.137   | -0.119  | -0.161   | 0.101  | -0.137  | 0.084  |
| H3K9A    | 0.085  | 0.082   | 0.137   | -0.031   | -0.005   | 0.051  | 0.005   | 0.034   | 0.14    | -0.058  | -0.072   | 0.127  | -0.06   | 0.112  |
| H3S10A   | 0.078  | 0.1     | 0.139   | 0.074    | 0.039    | 0.054  | 0.033   | 0.036   | 0.092   | -0.013  | 0.013    | 0.177  | 0.025   | 0.157  |
| H3K56A   | 0.069  | 0.072   | 0.119   | -0.021   | -0.009   | 0.035  | -0.007  | 0.019   | 0.106   | -0.069  | -0.078   | 0.158  | -0.061  | 0.137  |
| H3K18A   | 0.094  | 0.096   | 0.16    | -0.009   | 0.007    | 0.059  | 0.005   | 0.035   | 0.145   | -0.056  | -0.057   | 0.139  | -0.038  | 0.124  |
| H4R3A    | 0.149  | 0.139   | 0.209   | -0.001   | 0.035    | 0.111  | 0.033   | 0.086   | 0.209   | -0.032  | -0.037   | 0.147  | -0.014  | 0.135  |
| H4K20A   | 0.008  | 0.029   | 0.055   | -0.013   | -0.029   | -0.018 | -0.012  | -0.024  | 0.029   | -0.062  | -0.074   | 0.157  | -0.071  | 0.13   |
| H4K5A    | 0.114  | 0.117   | 0.173   | 0.044    | 0.048    | 0.089  | 0.032   | 0.062   | 0.147   | -0.014  | 0        | 0.135  | 0.022   | 0.125  |
| H4K91A   | 0.052  | 0.027   | 0.089   | -0.147   | -0.073   | 0.021  | -0.041  | 0       | 0.128   | -0.108  | -0.174   | 0.068  | -0.155  | 0.054  |
| H4K16A   | 0.026  | 0.046   | 0.086   | -0.002   | -0.02    | -0.002 | -0.012  | -0.016  | 0.06    | -0.067  | -0.066   | 0.156  | -0.059  | 0.133  |
| H4K8A    | 0.074  | 0.062   | 0.13    | -0.093   | -0.042   | 0.031  | -0.027  | 0.013   | 0.141   | -0.101  | -0.133   | 0.104  | -0.114  | 0.092  |

Corr. Coef. (r)

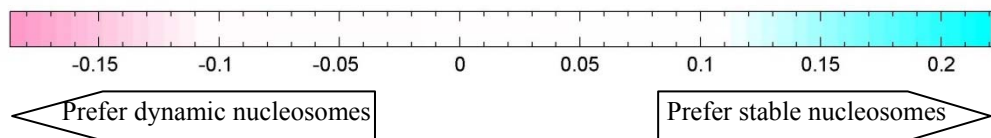

Figure S3

(a)

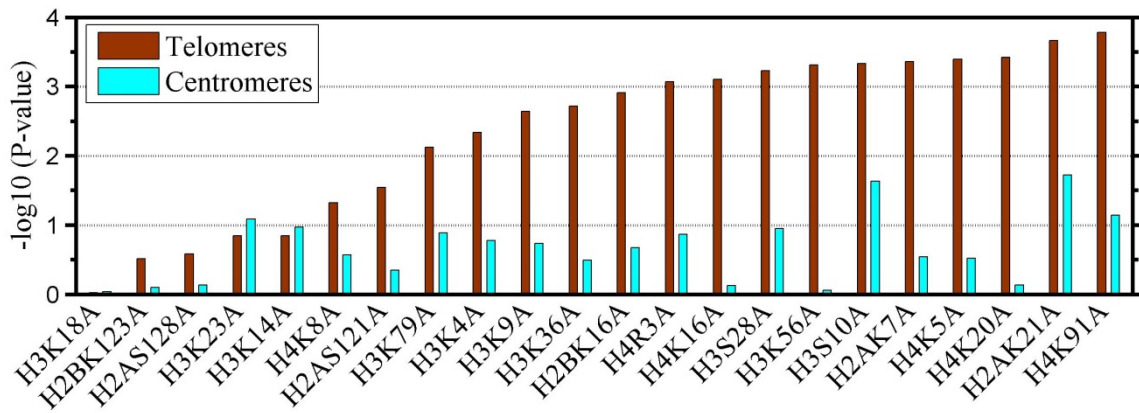

(b)

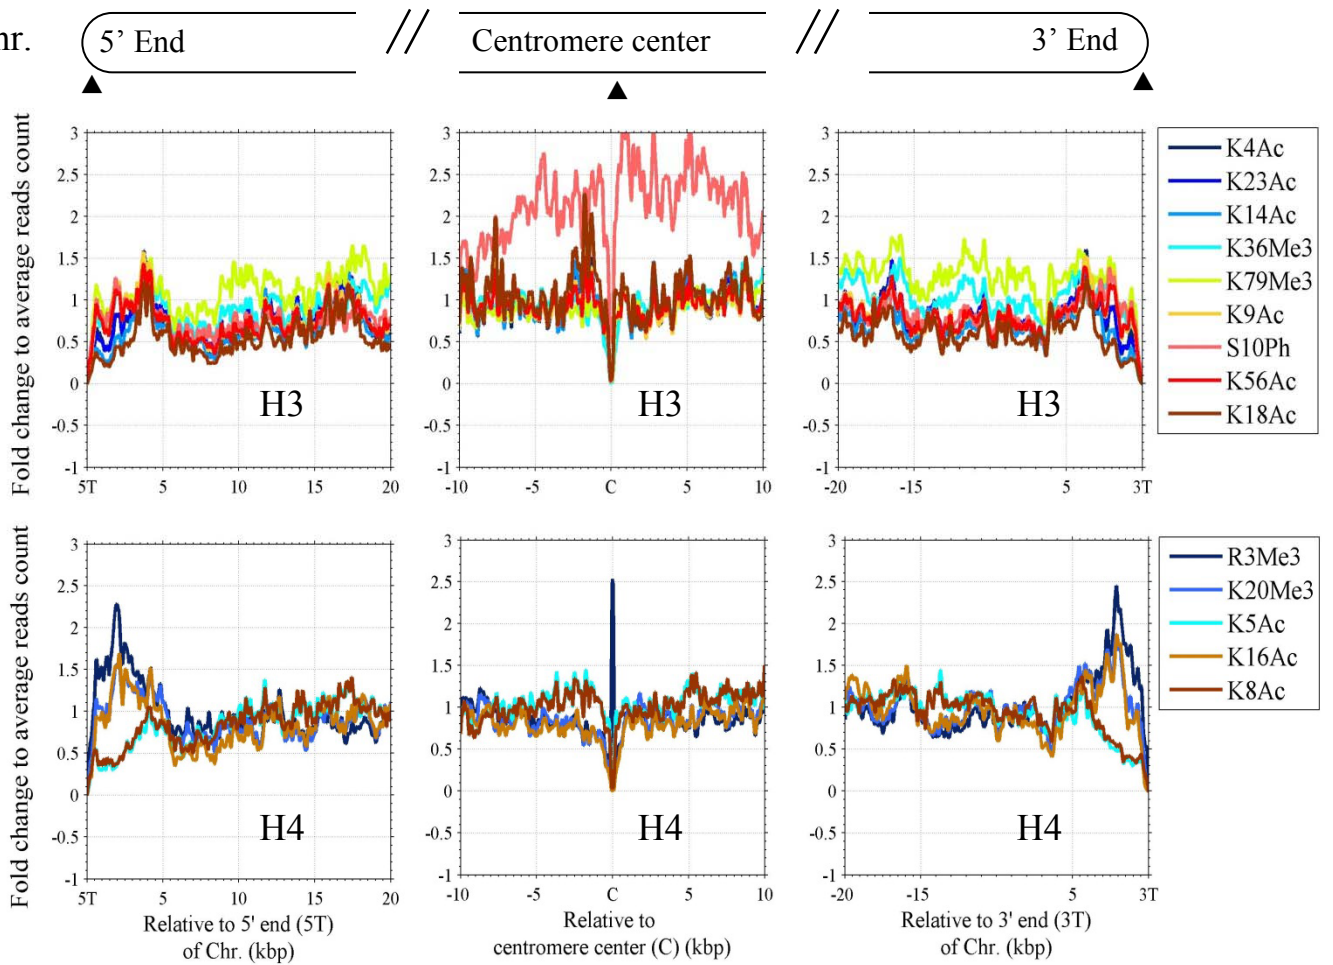

Figure S4

(a)

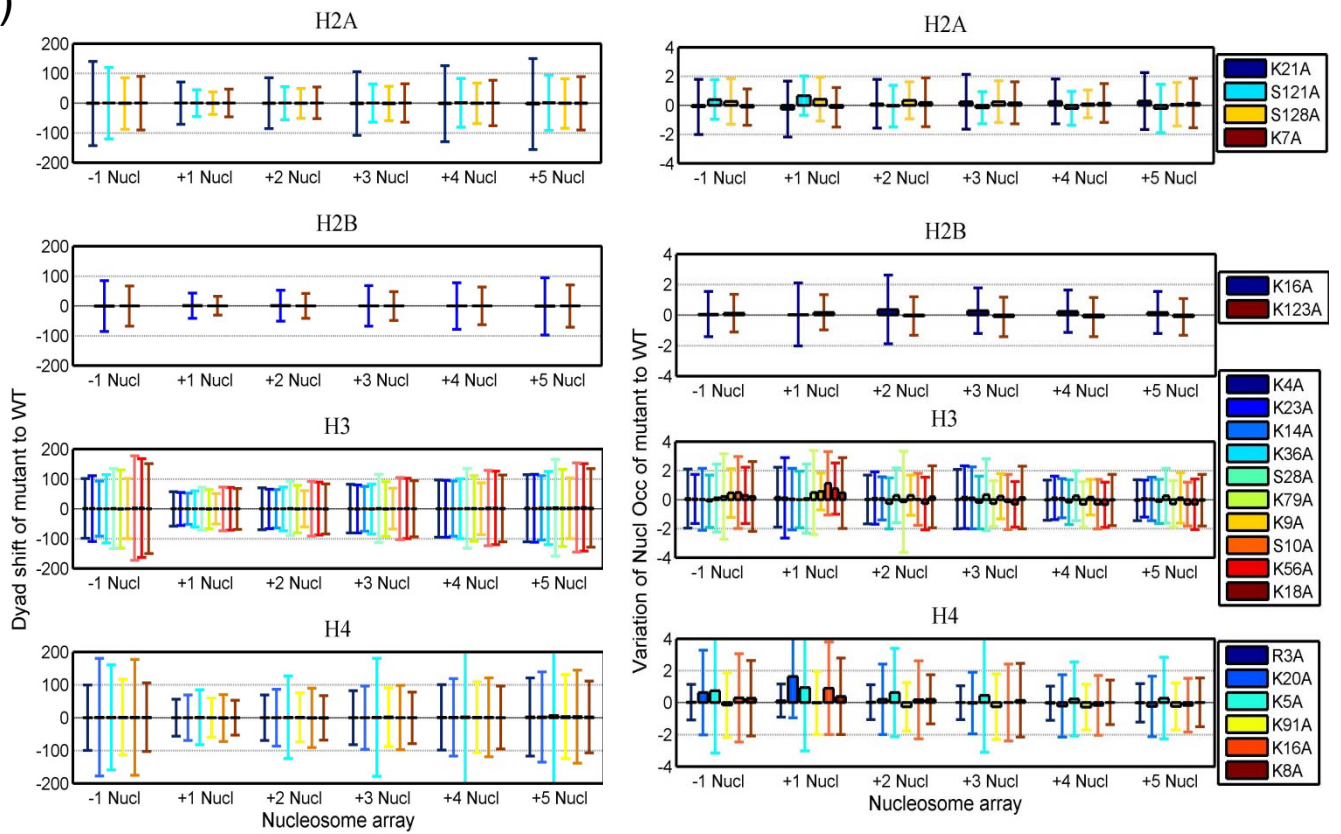

(b)

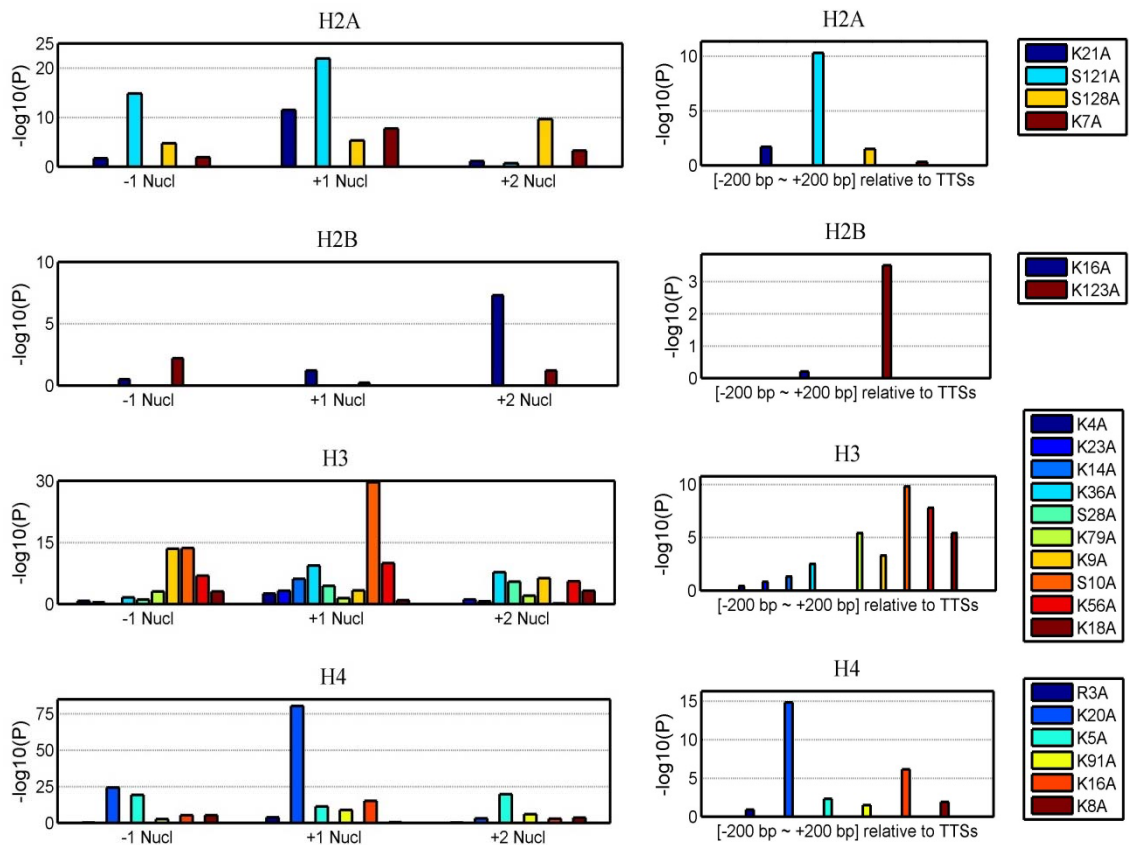

Figure S5

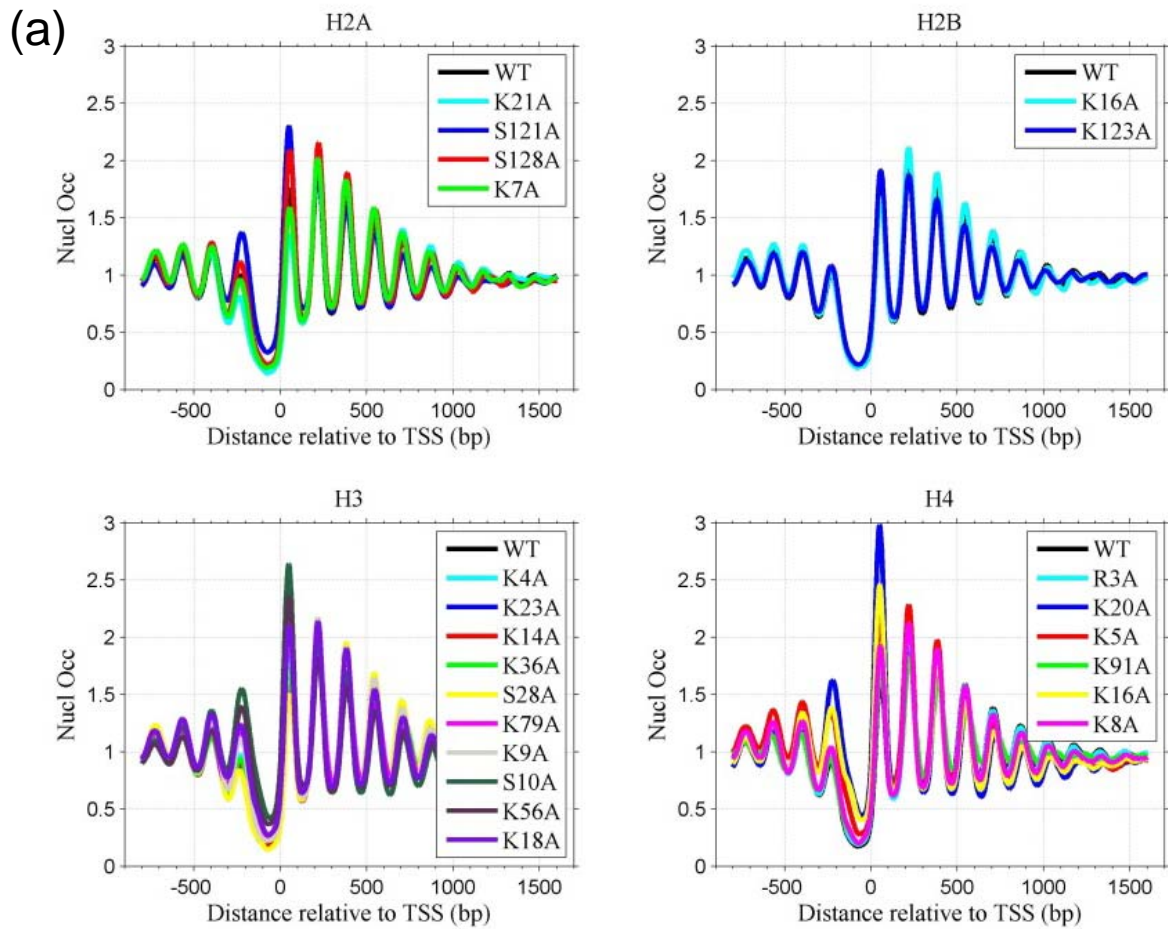

(b)

|          | Increase | Decrease | Left shift | Right shift | Loss | Gain |  | Increase | Decrease | Left shift | Right shift | Loss | Gain |
|----------|----------|----------|------------|-------------|------|------|--|----------|----------|------------|-------------|------|------|
| H2AK21A  | 73       | 1093     | 123        | 143         | 74   | 62   |  | 63       | 1203     | 119        | 135         | 60   | 56   |
| H2AS121A | 814      | 31       | 87         | 94          | 86   | 85   |  | 685      | 45       | 71         | 91          | 36   | 35   |
| H2AS128A | 154      | 110      | 121        | 118         | 30   | 22   |  | 164      | 58       | 121        | 96          | 17   | 18   |
| H2AK7A   | 96       | 446      | 98         | 101         | 20   | 22   |  | 77       | 471      | 103        | 95          | 18   | 27   |
| H2BK16A  | 100      | 486      | 96         | 108         | 16   | 19   |  | 91       | 503      | 78         | 86          | 12   | 19   |
| H2BK123A | 107      | 9        | 87         | 92          | 18   | 15   |  | 63       | 5        | 60         | 49          | 14   | 15   |
| H3K4A    | 413      | 161      | 169        | 161         | 24   | 27   |  | 449      | 159      | 125        | 135         | 28   | 25   |
| H3K23A   | 194      | 305      | 136        | 113         | 21   | 26   |  | 211      | 301      | 121        | 104         | 27   | 27   |
| H3K14A   | 315      | 230      | 153        | 138         | 21   | 20   |  | 317      | 219      | 125        | 118         | 28   | 27   |
| H3K36A   | 433      | 189      | 180        | 138         | 32   | 33   |  | 507      | 195      | 146        | 114         | 35   | 39   |
| H3S28A   | 172      | 644      | 134        | 120         | 37   | 39   |  | 156      | 692      | 125        | 105         | 44   | 29   |
| H3K79A   | 871      | 133      | 190        | 146         | 69   | 55   |  | 1056     | 121      | 135        | 124         | 71   | 58   |
| H3K9A    | 411      | 65       | 106        | 111         | 26   | 15   |  | 387      | 59       | 91         | 83          | 13   | 16   |
| H3S10A   | 1042     | 52       | 129        | 116         | 352  | 352  |  | 1483     | 80       | 95         | 92          | 137  | 144  |
| H3K56A   | 1117     | 95       | 115        | 134         | 230  | 222  |  | 1334     | 139      | 92         | 100         | 125  | 110  |
| H3K18A   | 617      | 128      | 153        | 135         | 138  | 143  |  | 697      | 153      | 118        | 111         | 53   | 64   |
| H4R3A    | 296      | 37       | 131        | 100         | 27   | 24   |  | 329      | 29       | 99         | 88          | 37   | 25   |
| H4K20A   | 1297     | 67       | 162        | 130         | 340  | 359  |  | 2054     | 95       | 91         | 92          | 86   | 85   |
| H4K5A    | 692      | 644      | 153        | 166         | 178  | 161  |  | 813      | 895      | 117        | 116         | 48   | 58   |
| H4K91A   | 306      | 299      | 208        | 181         | 36   | 38   |  | 353      | 253      | 181        | 165         | 36   | 33   |
| H4K16A   | 783      | 117      | 165        | 161         | 303  | 314  |  | 1192     | 177      | 123        | 118         | 78   | 88   |
| H4K8A    | 440      | 201      | 145        | 140         | 24   | 22   |  | 456      | 175      | 132        | 106         | 22   | 31   |

The -1 nucleosome                      The +1 nucleosome

Figure S6

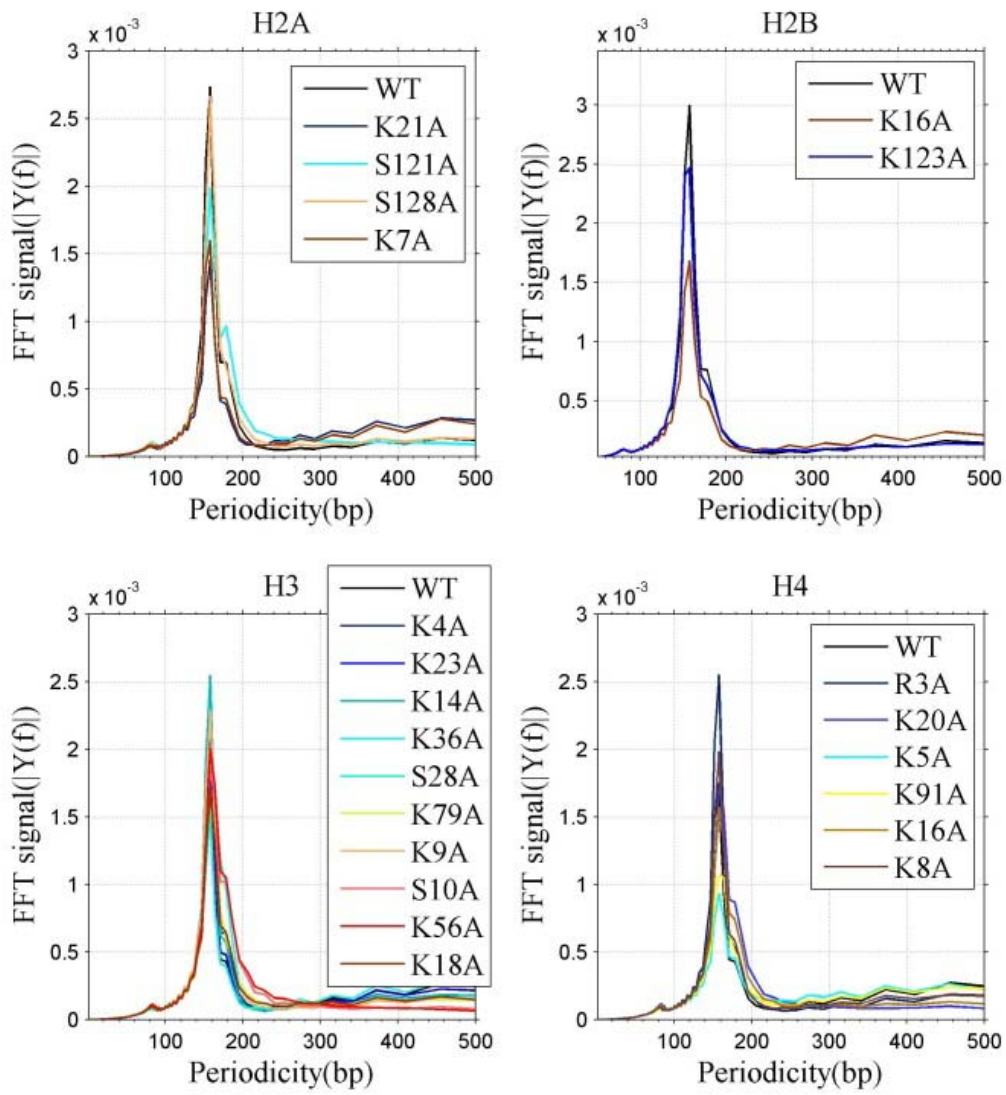

Figure S7

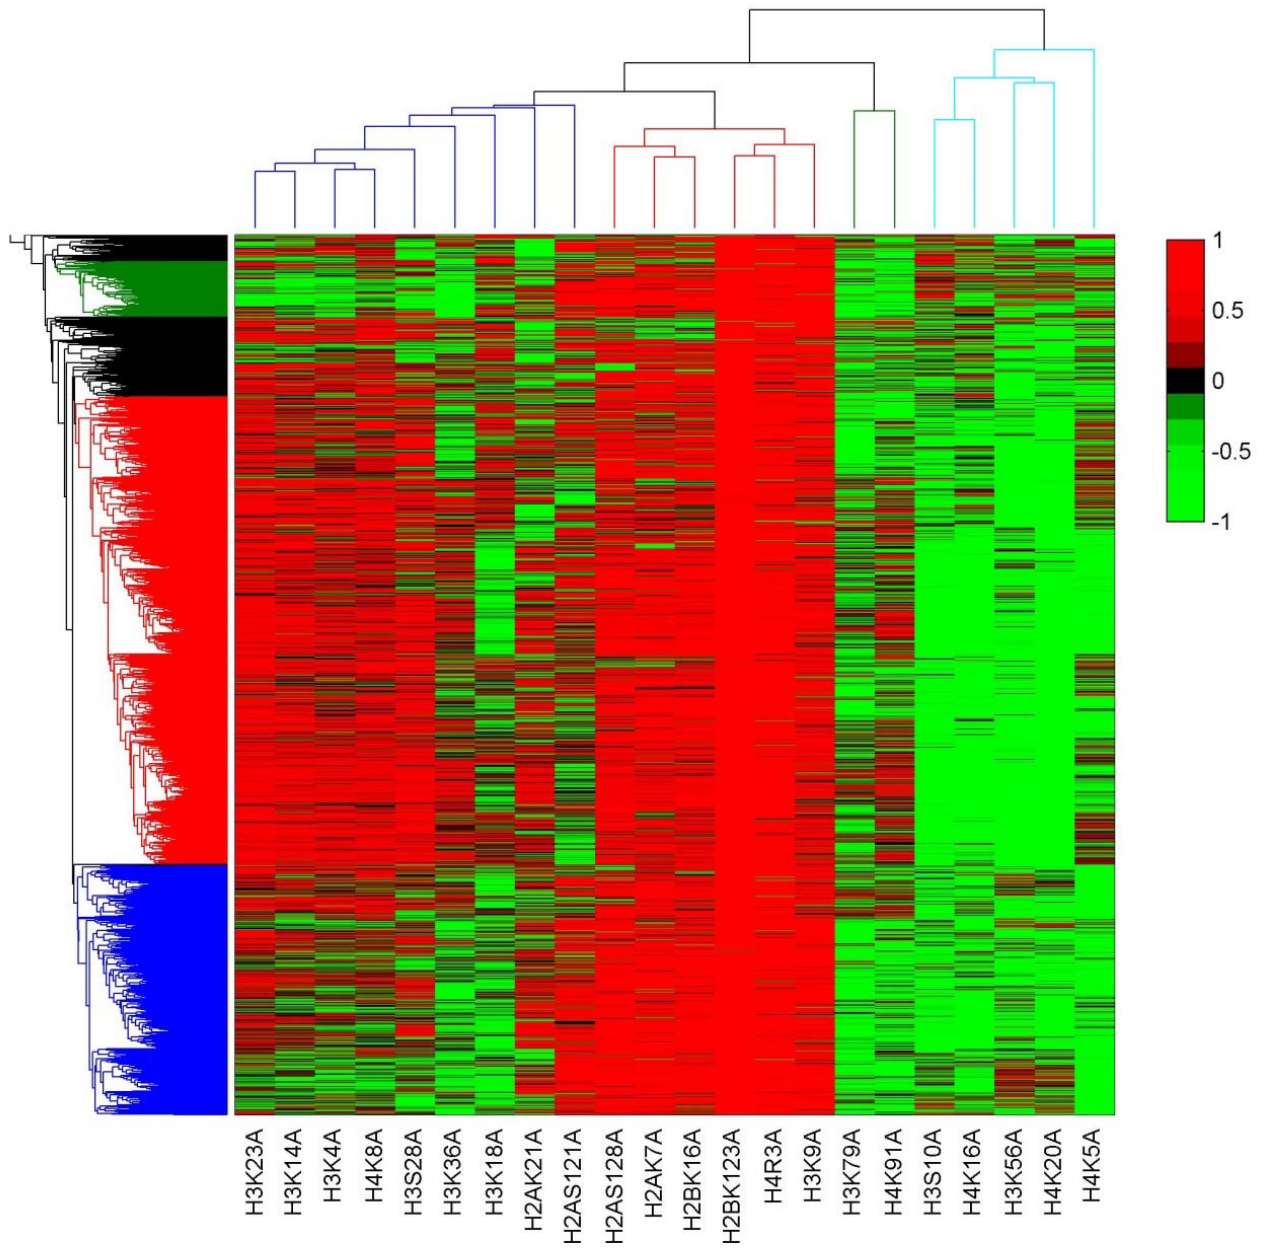

Figure S8

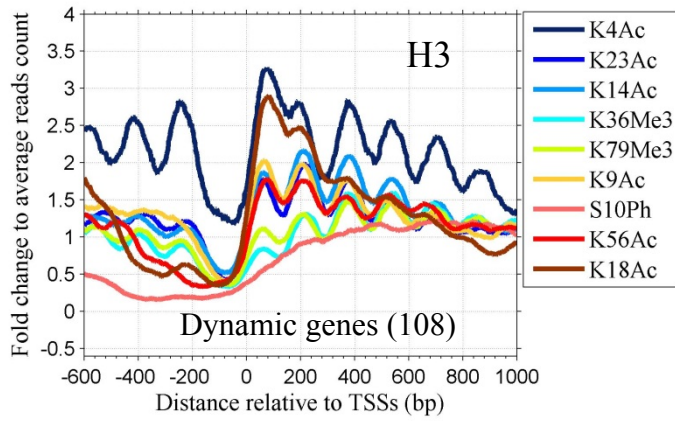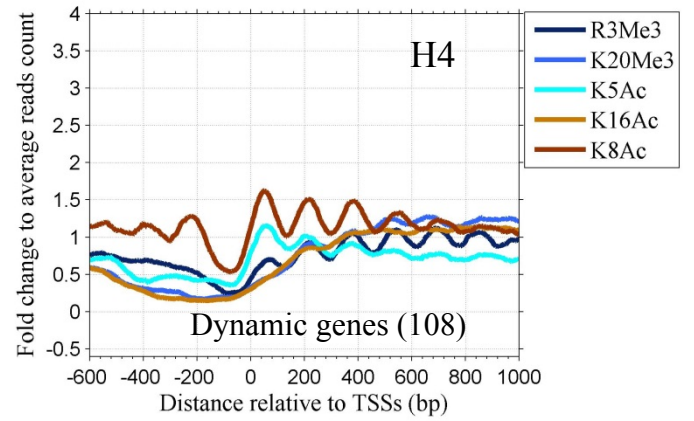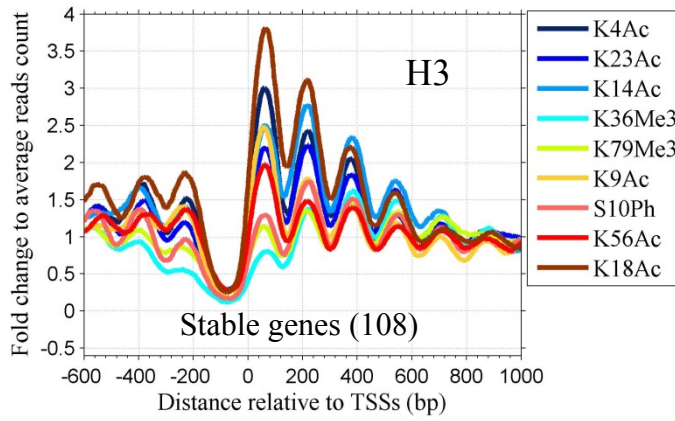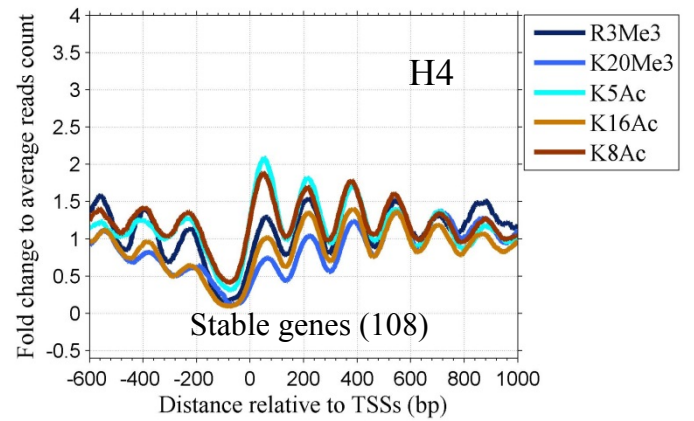



Figure S9

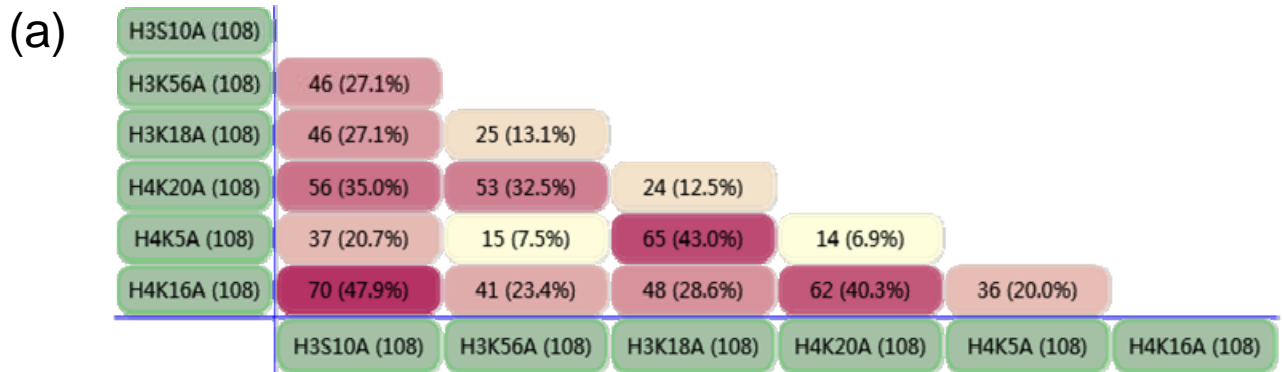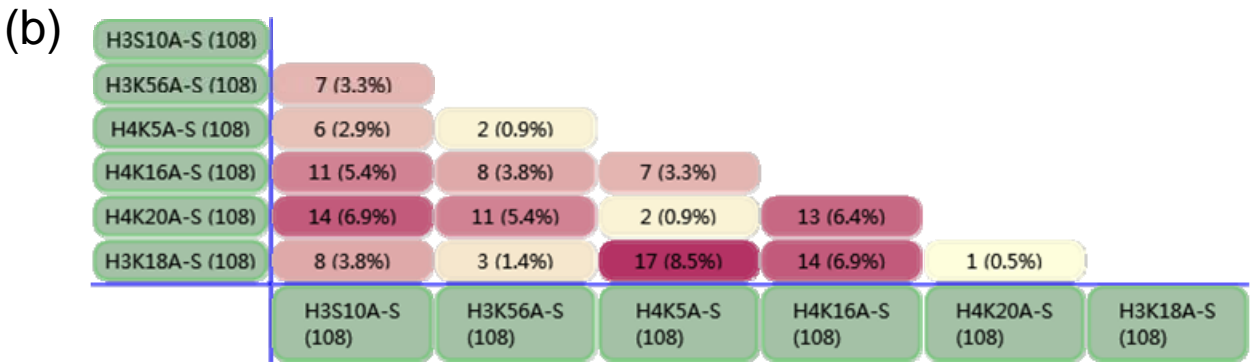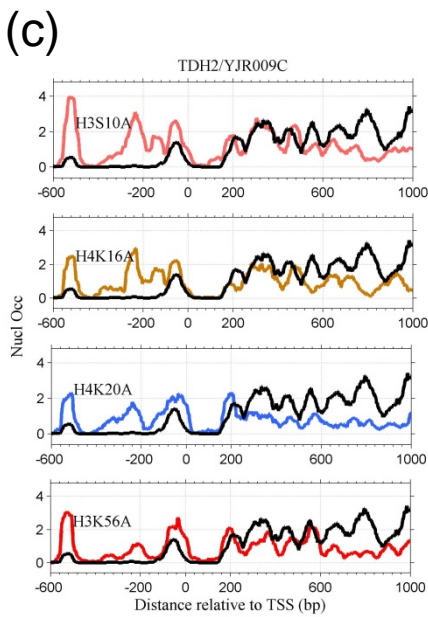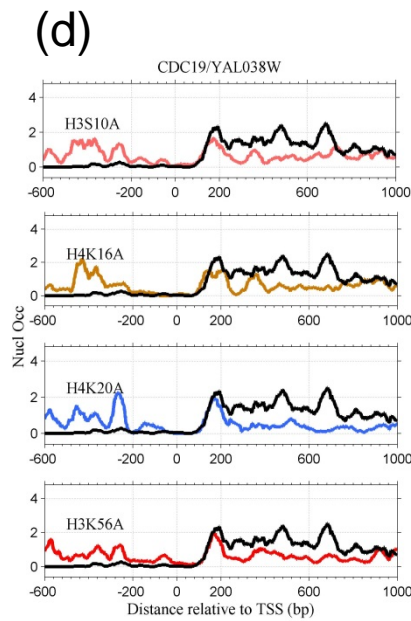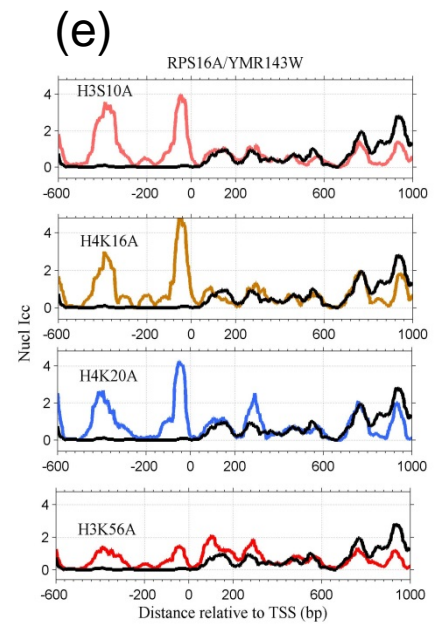

Figure S10

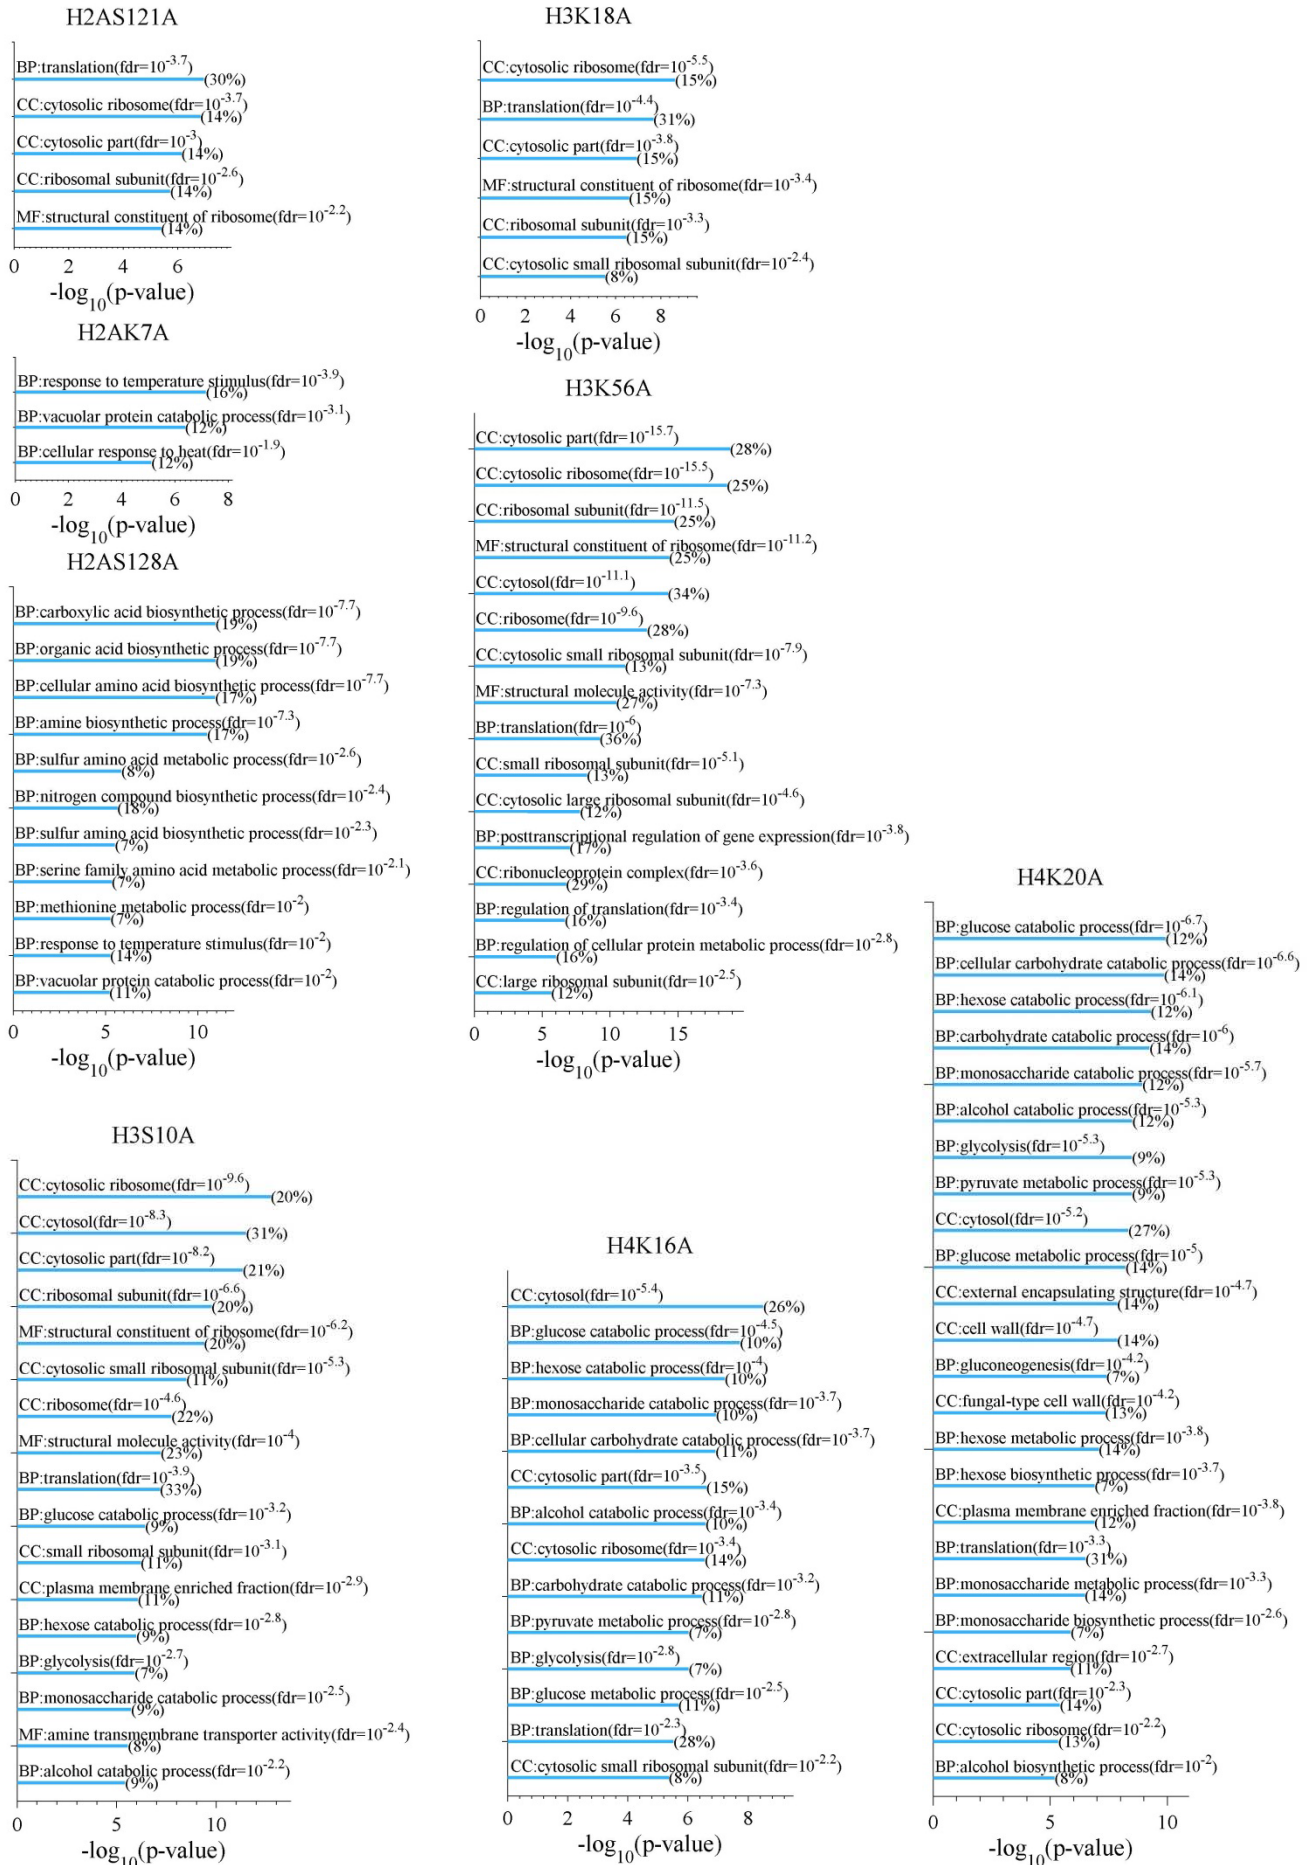

Figure S11

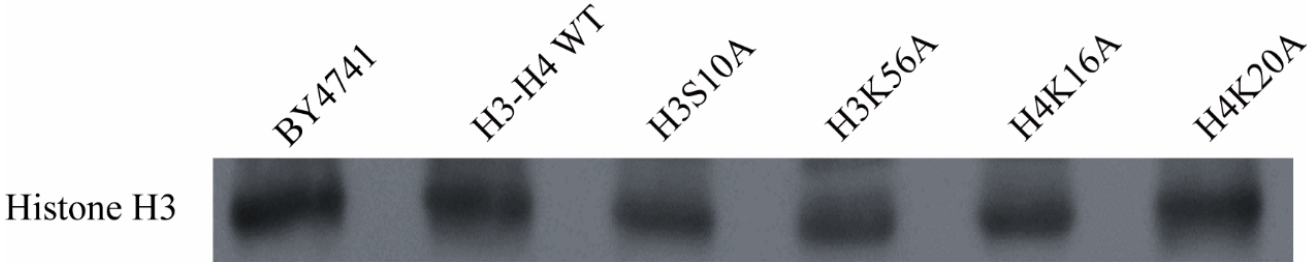

Figure S12

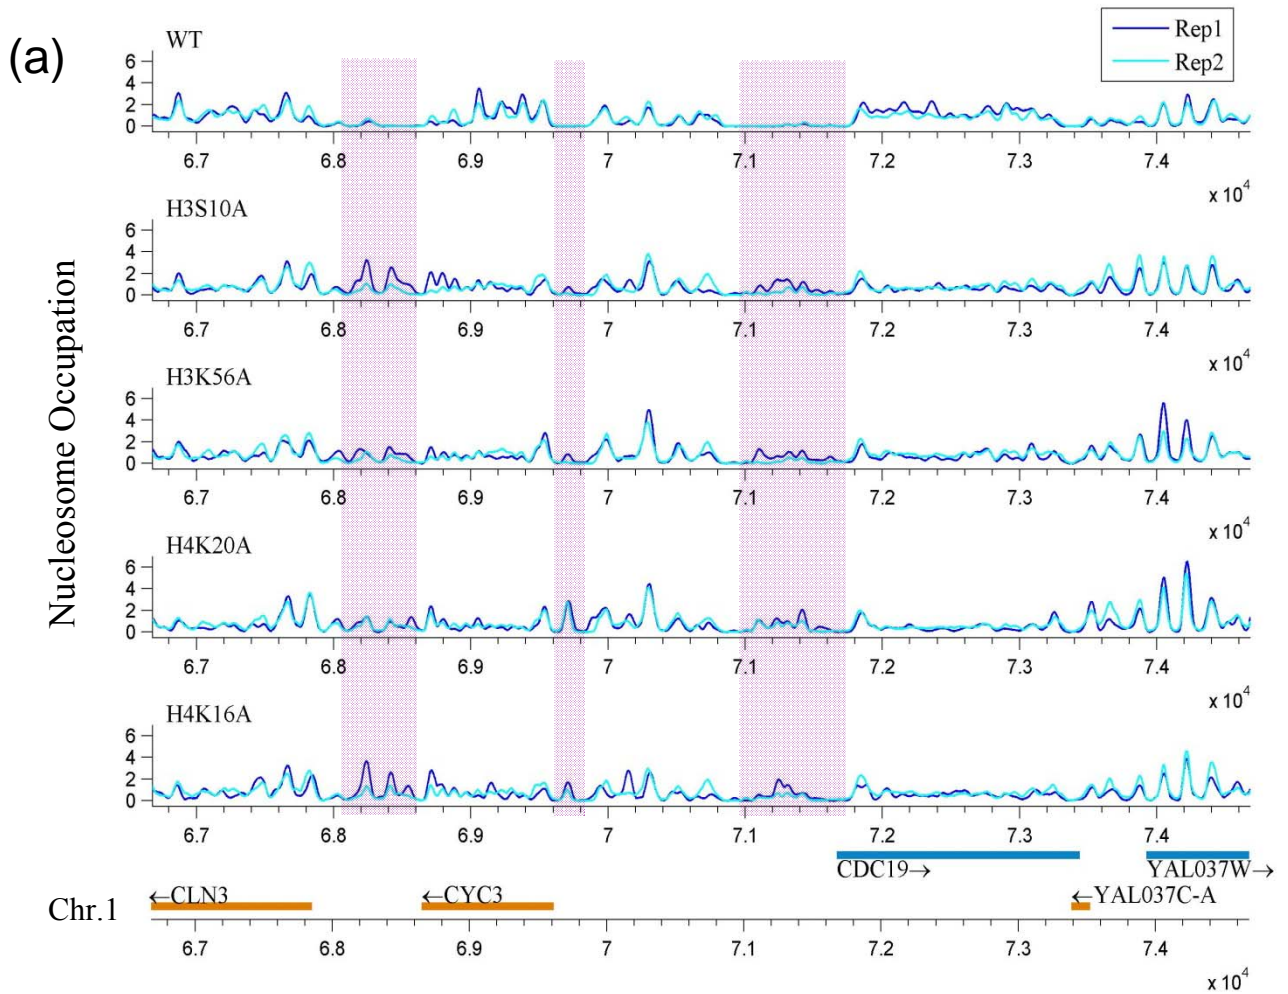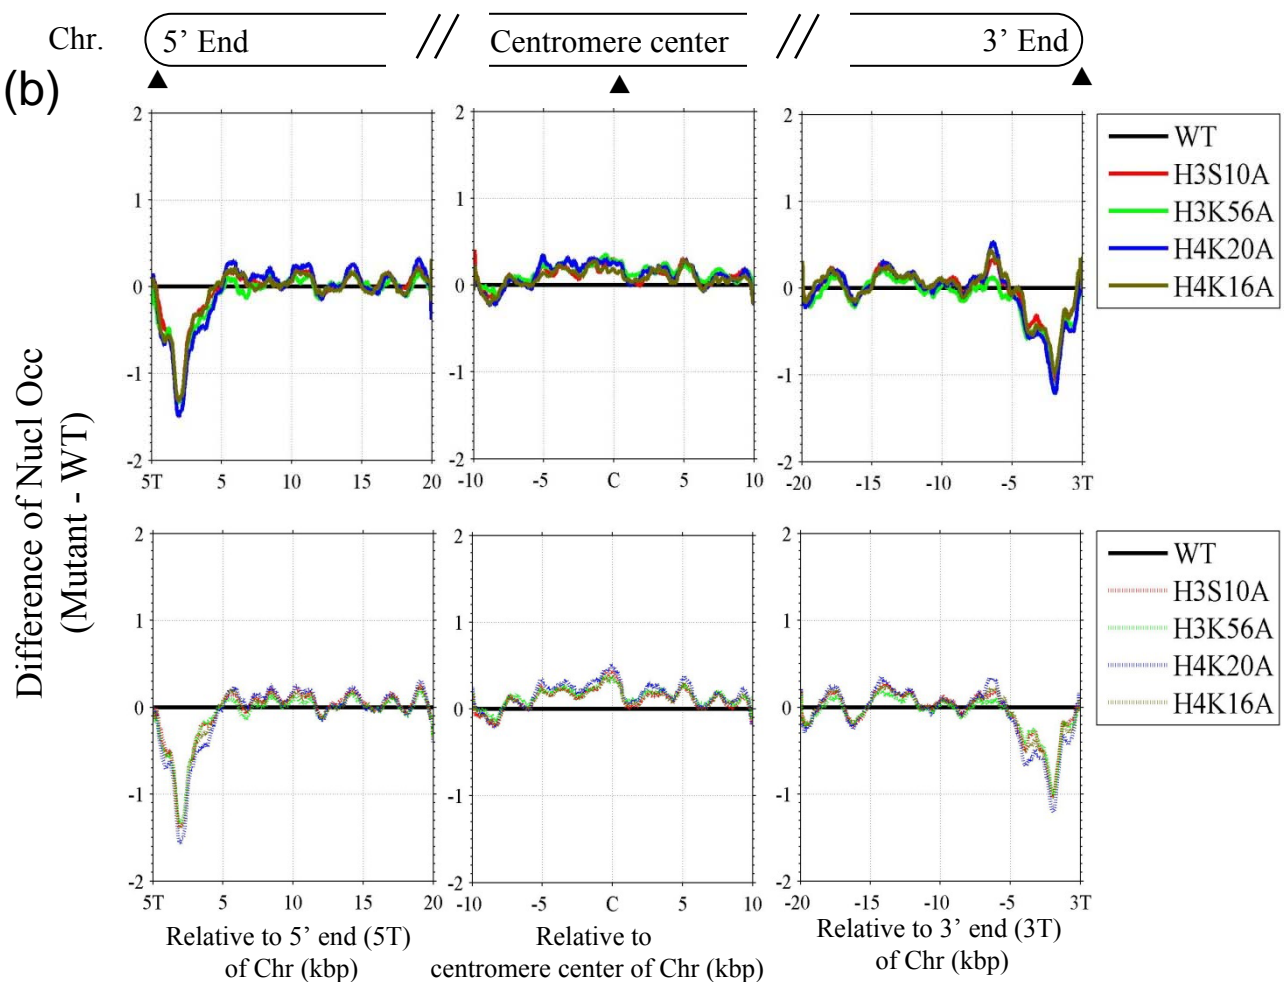

Supplement: srep15583-s1.pdf [file srep15583-s1.pdf]
